# Supplementary material
Source: PubMed Central journal article supplement (PMC3397340)
Supplement: supp_jn.112.161828_nut161828-STable_1.pdf [file supp_jn.112.161828_nut161828-STable_1.pdf]

**Online Supporting Material**

**Status of vitamin B-12 and B-6 but not of folate, homocysteine and the methylenetetrahydrofolate reductase C677T polymorphism are associated with impaired cognition and depression in adults**

Denish Moorthy, Inga Peter, Tammy M. Scott, Laurence D. Parnell, Chao-Qiang Lai, Jimmy W. Crott, José M. Ordovás, Jacob Selhub, John Griffith, Irwin H. Rosenberg, Katherine L. Tucker, Aron M. Troen

**Supplemental Table 1: Tests comprising Factors for Memory, Attention and Executive Function in NAME and BPRHS**

| FACmem <sup>1</sup>                                   |                                         | FACexec <sup>2</sup>                                  |                             | FACattn <sup>3</sup> |                                              |
|-------------------------------------------------------|-----------------------------------------|-------------------------------------------------------|-----------------------------|----------------------|----------------------------------------------|
| NAME                                                  | BPRHS                                   | NAME                                                  | BPRHS                       | NAME                 | BPRHS                                        |
| Logical Memory: Delay Recall Story Thematic Score (1) | Word List Learning Short-term (1)       | WAIS-III Digit Symbol – Coding total Raw Score (2)    | Stroop Color (3)            | ADAS-COG Naming (4)  | WAIS-III Digit Span Digit Backward Score (1) |
| Logical Memory: Recall Total Score (1)                | Word List Learning Long-term Recall (1) | Mental Alterations (5)                                | Stroop Color Perception (3) | Digit Span (1)       | WAIS-III Digit Span Digit Forward Score (1)  |
| Logical Memory: Thematic Total Score (1)              | Word List Learning Recognition (1)      | Controlled Oral Word Association Test Total Words (6) | Figure Copying (7)          |                      |                                              |
| Logical Memory: Percent Retention (1)                 |                                         | WAIS-III Block Design Total Raw score (1)             | Clock Drawing (8)           |                      |                                              |
| Logical Memory: Recognition Total Score (1)           |                                         | WAIS-III Matrix Reasoning Raw Score (1)               |                             |                      |                                              |
| Word List Learning: Recognition Total Score (1)       |                                         | Trails A time (2)                                     |                             |                      |                                              |
| Word List Learning: Recall Total Score (1)            |                                         | Trails B time (2)                                     |                             |                      |                                              |
| Word List Learning: Percent Retention (1)             |                                         |                                                       |                             |                      |                                              |

<sup>1</sup> FACmem = Factor Scores for Memory; <sup>2</sup> FACexec = Factor Scores for Executive Function; <sup>3</sup> FACattn = Factor Scores for Attention

1. Tulskey, D., Zhu, J. & Lebetter, M. (1997) Wechsler Adult Intelligence Scale - Third Edition (WAIS-III), Wechsler Memory Scale - Third Scale (WMS-III): Technical Manual., Third ed., The Psychological Corporation /Harcourt Brace & Co, San Antonio, TX.
2. Heaton, R., Grant, I. & Matthews, C. (1991) Comprehensive Norms for an Expanded Halstead-Reitan Battery. Psychological Assessment Resources, Inc., Odessa, Florida.
3. Jensen, A. R. & Rohwer, W. D., Jr. The Stroop color-word test: a review. *Acta Psychol (Amst)* 1966 25: 36-93.
4. Connor, D. J. & Sabbagh, M. N. Administration and scoring variance on the ADAS-Cog. *J Alzheimers Dis* 2008 15: 461-464.
5. Jones, B. N., Teng, E. L., Folstein, M. F. & Harrison, K. S. A new bedside test of cognition for patients with HIV infection. *Ann Intern Med* 1993 119: 1001-1004.
6. Benton, A. L. & Hamsher, K. D. (1989) Multilingual Aphasia Examination., 2nd ed., AJA Associates, Iowa City, Iowa.
7. Carr, E. K. & Lincoln, N. B. Inter-rater reliability of the Rey figure copying test. *Br J Clin Psychol* 1988 27 ( Pt 3): 267-268.
8. Borson, S., Brush, M., Gil, E., Scanlan, J., Vitaliano, P., Chen, J., Cashman, J., Sta Maria, M. M., Barnhart, R. & Roques, J. The Clock Drawing Test: utility for dementia detection in multiethnic elders. *J Gerontol A Biol Sci Med Sci* 1999 54: M534-M540.
